# Supplementary material
Source: PubMed Central journal article supplement (PMC6192855)
Supplement: NIHMS965093-supplement-Supp1.pdf [file NIHMS965093-supplement-Supp1.pdf]

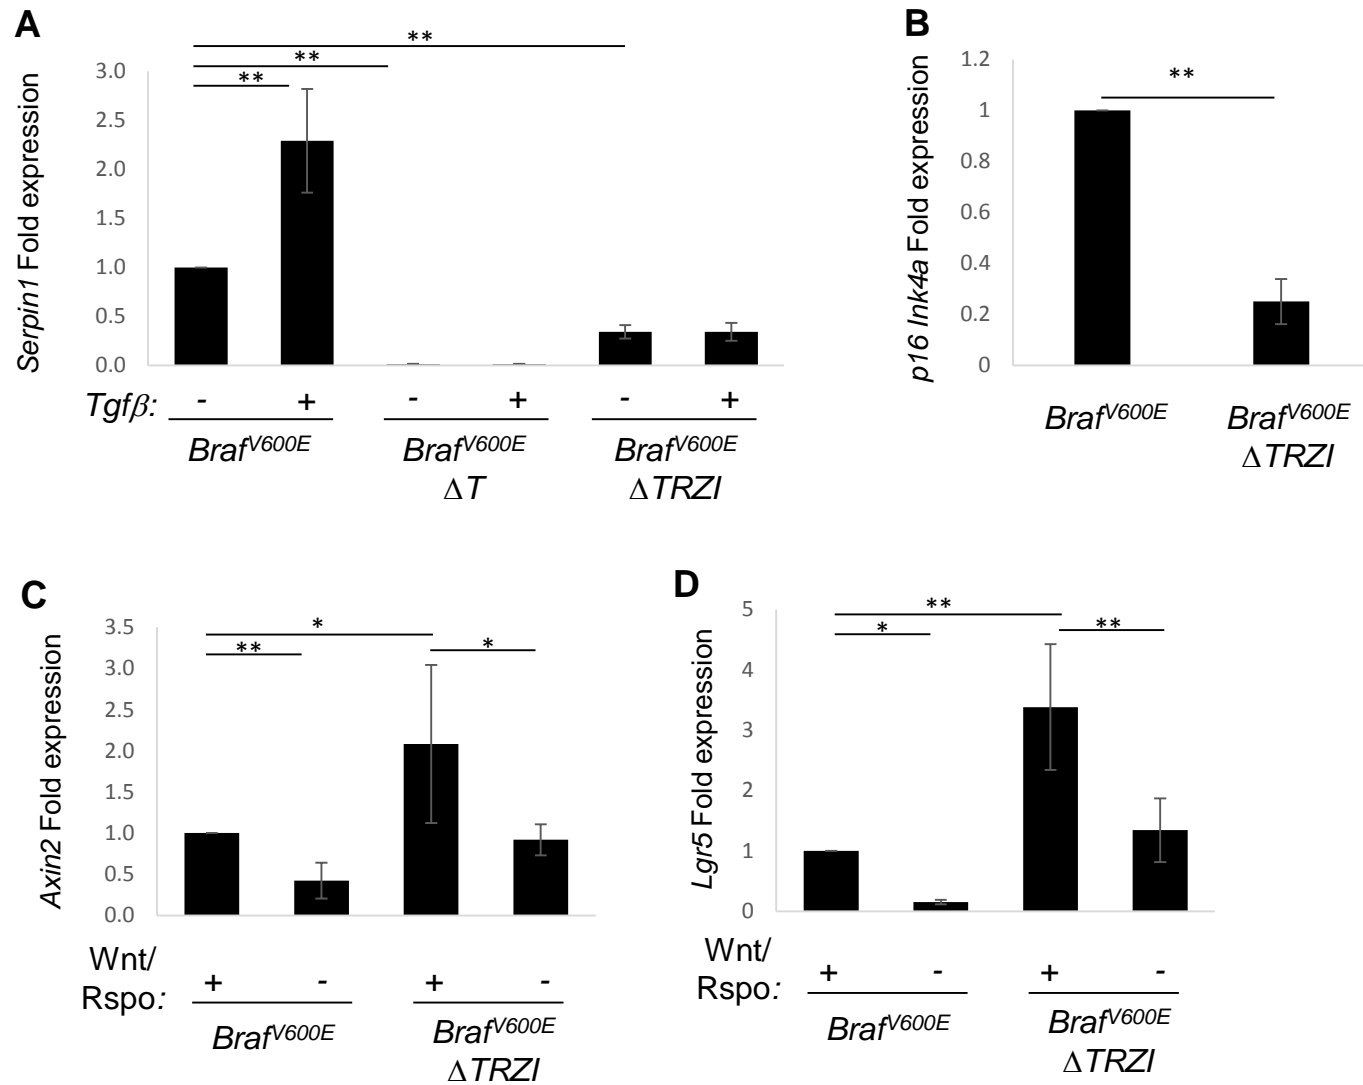

**Supplementary Figure 3. A**, Expression of *Serpin-1*, a Tgfβ response gene, is not induced following treatment with Tgfβ in *Tgfβr2* mutant organoids. **B**, *p16Ink4a* RNA levels are decreased in *p16Ink4a* mutant organoids. **C-D**, Transcript levels of two Wnt-responsive genes, *Axin2* and *Lgr5*, are increased in organoids with mutations in the two negative regulators of the Wnt-pathway, *Rnf43* and *Znrf3*. Fold induction of mRNA expression is normalized to *Gapdh*, with transcript level in *Braf<sup>V600E</sup>* organoids in complete medium set to 1. Results from at least three independent experiments performed in triplicate are shown, error bars denote standard deviation. Two-tailed t-test was used for pair-wise statistical analysis. \*=p<0.05, \*\*=p<0.01.

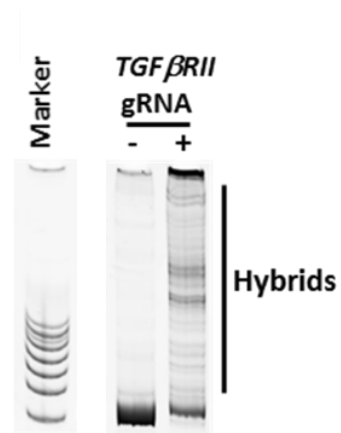

**Supplementary Figure 4.** Effective targeting of genes associated with serrated CRC using CRISPR/Cas9 gene editing followed by media selection of correctly targeted clones. **A**, Melt/reanneal of PCR amplicons from *Tgfβ2* targeted genomic region in edited clones show the formation of hybrid complexes (slower migrating bands) in the presence of specific gRNAs but not the empty gRNA control by PAGE.

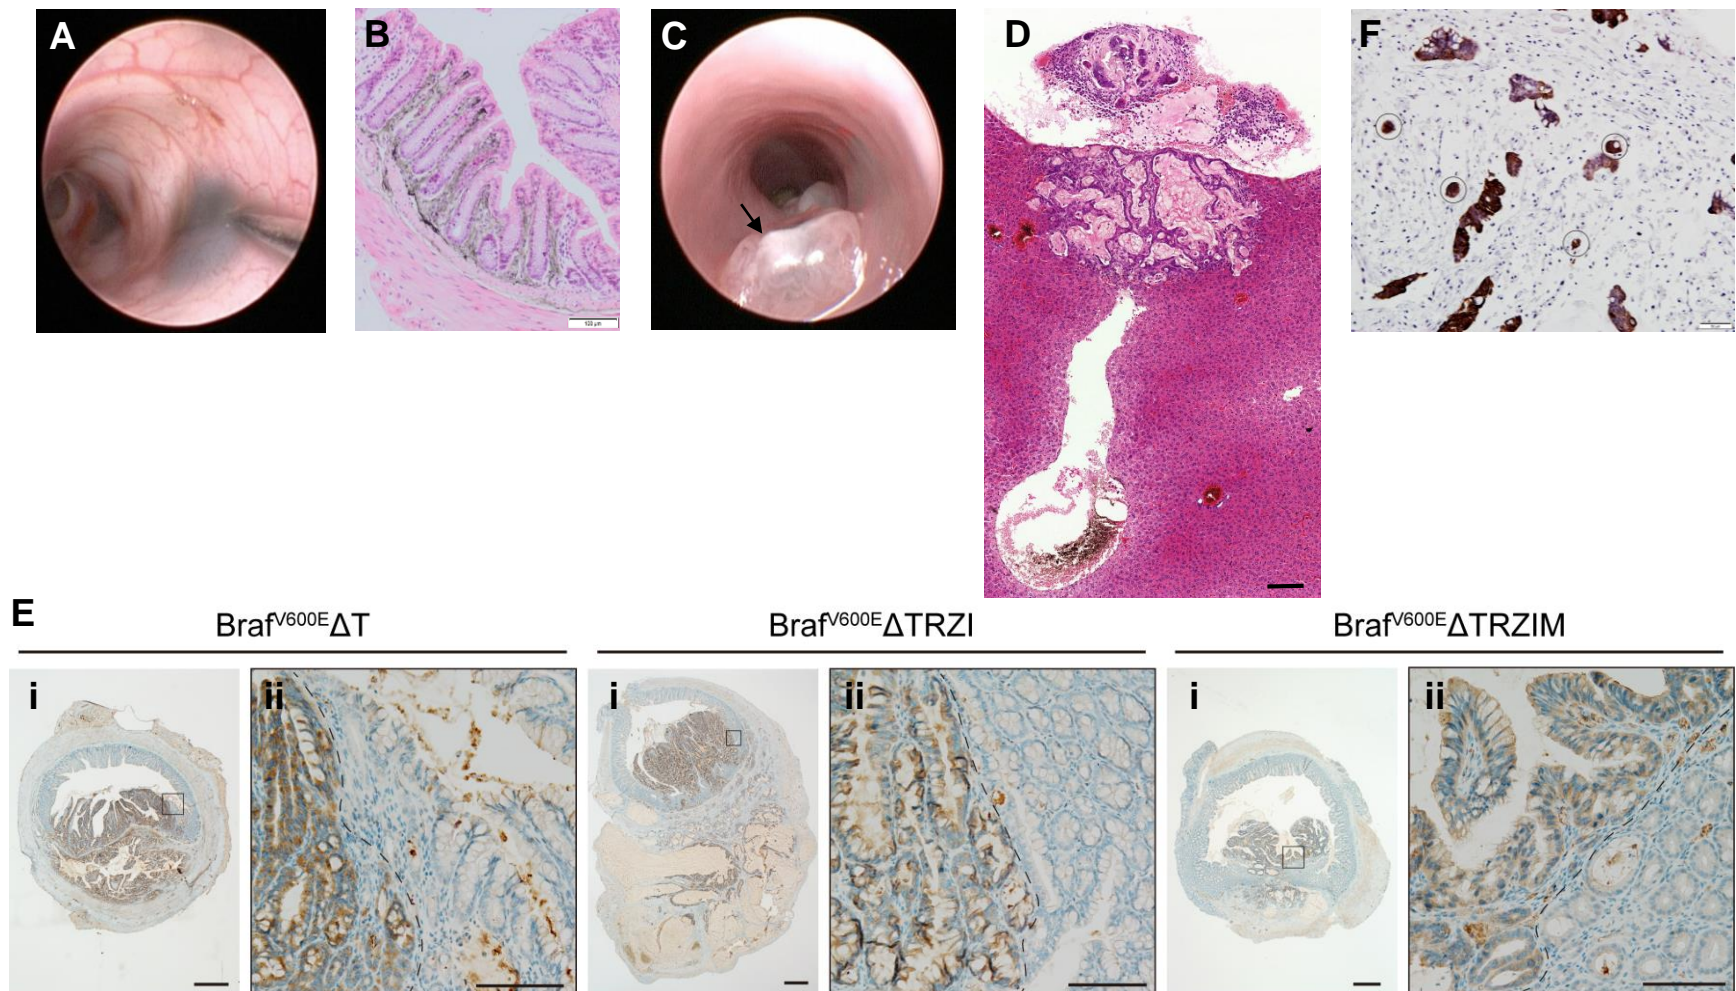

**Supplementary Figure 5.** Orthotopic injection site in colon wall. **A**, Colonoscopic image with needle and dark ink spots at injection sites and **B**, histological location of injected dye immediately adjacent to the colonic epithelium in the mucosal layer. **C**, Representative colonoscopy image of *Braf<sup>V600E</sup>ΔTRZI* tumours showing white mucous cap on *Braf<sup>V600E</sup>ΔTRZI* tumours (arrow). **D**, histology of infrequent liver metastasis (n=1 from 11 mice) in *Braf<sup>V600E</sup>ΔTRZI* injected animals. **E**, low (i) and high (ii) power images of immunohistochemical staining for mutant Brav600E protein in serratoid derived tumour cells. These are the same samples as depicted in Figure 4D but here high power image focusses on part of the section with tumour (to left of dashed line in ii) and normal epithelium (to right of dashed line in ii). **F**, tumour budding (circled) from *Braf<sup>V600E</sup>ΔTRZI* tumours is positive for cytokeratin 20 (CK20) by immunohistochemistry. Scale bars 500um (Ei), 100um (B, D Eii), 50um (F).

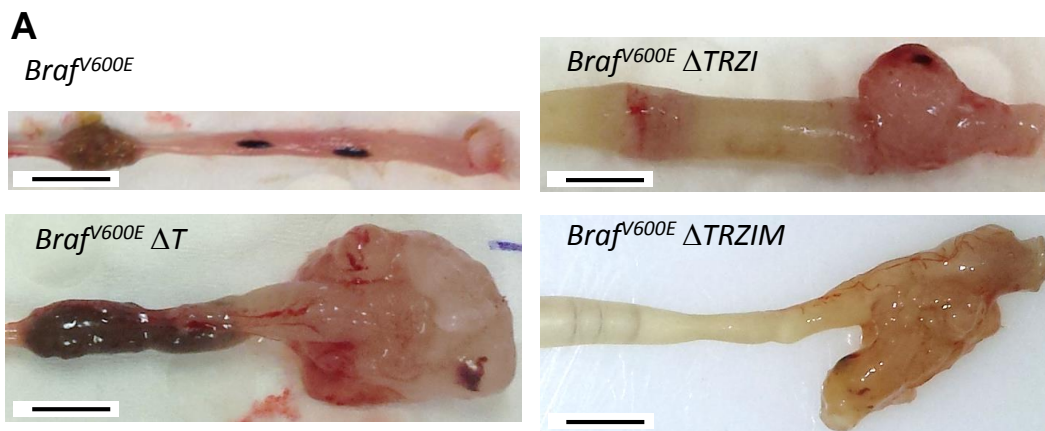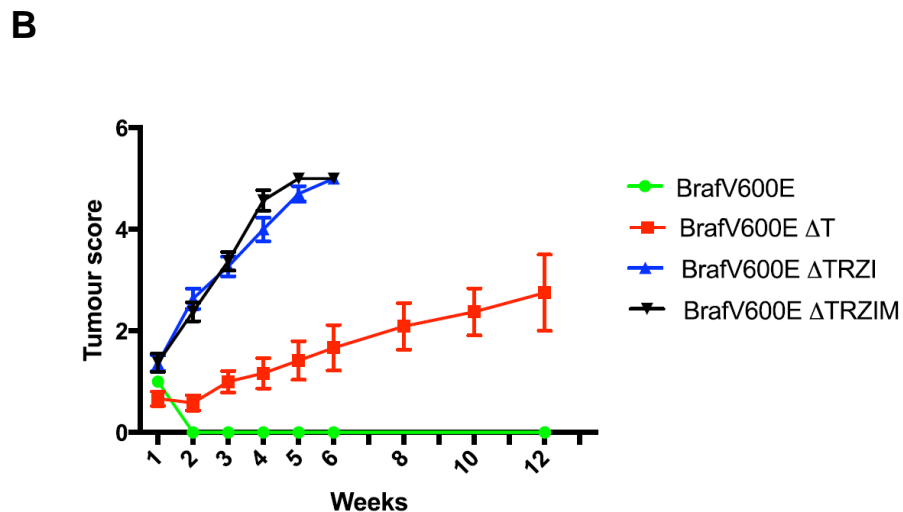

**Supplementary Figure 6. A**, Necropsy images of dissected distal colon showing ink spots only following *Braf<sup>V600E</sup>* organoid injections and invasion/extra-colonic growth from more complex organoid lines. Scale bar is 0.5cm. **B**, Colonoscopic scoring of largest tumour in each mouse (n=5 mice per group, Becker scale). Extended time course for tumour scoring to show relatively slow growth of *Braf<sup>V600E</sup> ΔT* tumours out to 12 weeks (Figure 3C depicts the same data but finishes at 6weeks).

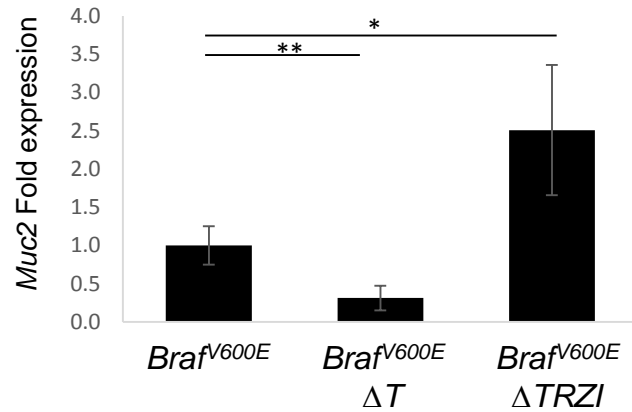

**Supplementary Figure 7.** Expression *Muc2*, a goblet cell marker and core component of the mucus layer is increased in *Braf*<sup>V600E</sup>Δ*TRZI* but not *Braf*<sup>V600E</sup>Δ*T* mutant organoids. Fold induction of mRNA expression is normalized to *Gapdh*, with transcript level in *Braf*<sup>V600E</sup> organoids in complete medium set to 1. Results from at least three independent experiments performed in triplicate are shown, error bars denote standard deviation. Two-tailed t-test was used for pair-wise statistical analysis. \*= $p \leq 0.05$ , \*\*= $p \leq 0.01$ .

**A**

|                                                                                                      | Microsatellite Markers |                    |         |      |         |
|------------------------------------------------------------------------------------------------------|------------------------|--------------------|---------|------|---------|
|                                                                                                      | mBat-26                | mBat-67            | mBat-37 | GA29 | TG27    |
| Organoid donor mouse gDNA                                                                            | wt                     | wt                 | wt      | wt   | wt      |
| <i>BrafV</i> $\Delta$ TRZI Organoids                                                                 | wt                     | wt                 | wt      | wt   | wt      |
| Colon tumours generated by orthotopic injection of <i>BrafV</i> $\Delta$ TRZI Organoid (n=5)         | wt                     | wt                 | wt      | wt   | wt      |
|                                                                                                      | wt                     | wt                 | wt      | wt   | wt      |
|                                                                                                      | wt                     | wt                 | wt      | wt   | wt      |
|                                                                                                      | wt                     | wt                 | wt      | wt   | wt      |
|                                                                                                      | wt                     | wt                 | wt      | wt   | wt      |
| <i>BrafV</i> $\Delta$ TRZIM Organoid Line 1 ( <i>Mlh1</i> <sup><math>\Delta/\Delta</math></sup> )    | 1bp Del                | 3bp Del            | 1bp Del | wt   | wt      |
| <i>BrafV</i> $\Delta$ TRZIM Organoid Line 2 ( <i>Mlh1</i> <sup><math>\Delta/\Delta</math></sup> )    | ND                     | ND                 | 1bp Del | wt   | 2bp Del |
| <i>BrafV</i> $\Delta$ TRZIM Organoid Line 3 ( <i>Mlh1</i> <sup><math>\Delta/+</math></sup> )         | ND                     | ND                 | 1bp Del | wt   | wt      |
| Colon tumours generated by orthotopic injection of <i>BrafV</i> $\Delta$ TRZIM Organoid Line 1 (n=6) | 2bp Del                | 5bp Del + 32bp Del | 3bp Del | wt   | wt      |
|                                                                                                      | 1bp Del                | 4bp Del            | wt      | wt   | wt      |
|                                                                                                      | 1bp Del                | 5bp Del            | 1bp Ins | wt   | wt      |
|                                                                                                      | 1bp Del                | 4bp Del + 22bp Del | 1bp Del | wt   | wt      |
|                                                                                                      | 1bp Del                | 4bp Del + 22bp Del | 1bp Del | wt   | wt      |
|                                                                                                      | 1bp Del                | 4bp Del + 22bp Del | wt      | wt   | wt      |

**B**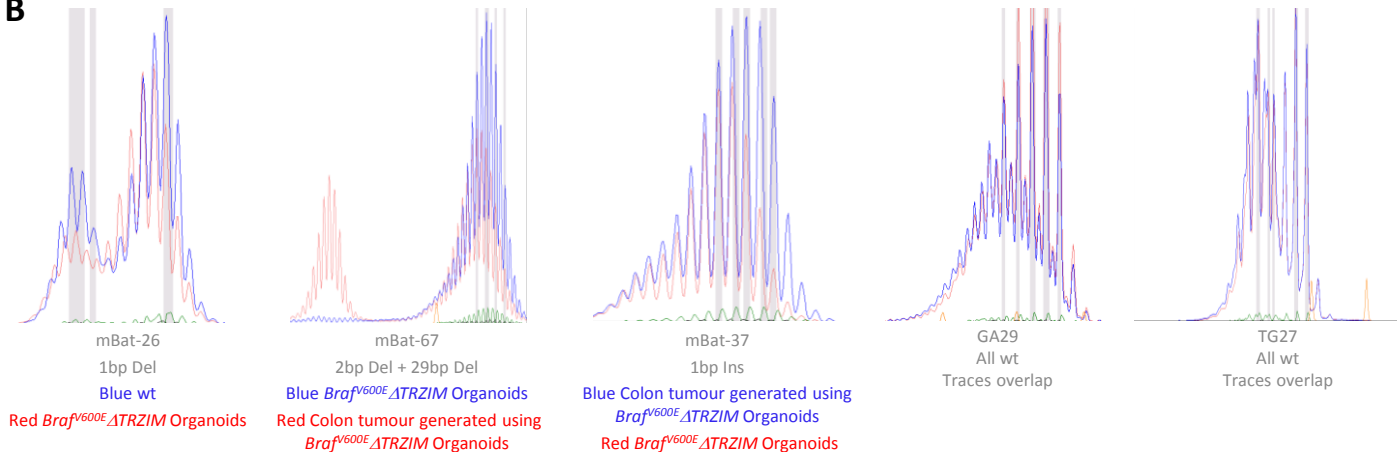

**Supplementary Figure 8.** Analysis of microsatellite instability using 5 validated mouse microsatellite markers. **A**, repeat tract length for 5 validated mouse microsatellite markers shows variability (MSI) in *Mlh1* mutant organoids and tumours, ND not determined. **B**, representative sequence traces of microsatellite marker length.

**Supplementary Figure 9. A**, colonic organoids derived from *Kras<sup>LSL-G12D/+</sup>;Apc<sup>fl/fl</sup>* mice, that were treated with Ad5CMV::Cre survived culture in the absence of Wnt3a or Rspo1. **B**, colonoscopic image showing orthotopic growth of *Kras<sup>G12D/+</sup>;Apc<sup>Δ580/Δ580</sup>* organoids. **C**, H&E and **D**, Ctnb1 immunohistochemistry of *Kras<sup>G12D/+</sup>;Apc<sup>Δ580/Δ580</sup>* tumours (20x). Genotyping of transgenic alleles confirm **(E)** homozygous recombination of the floxed *Apc* locus and **(F)** heterozygous recombination of the floxed *Kras* locus.

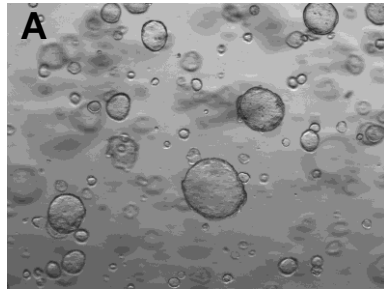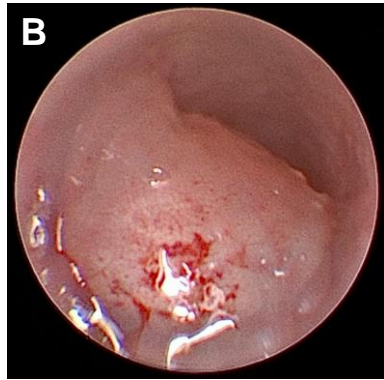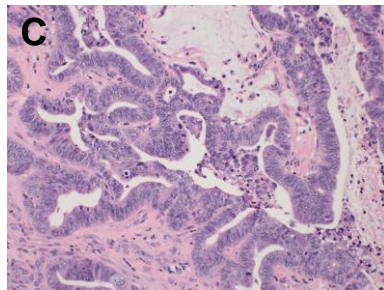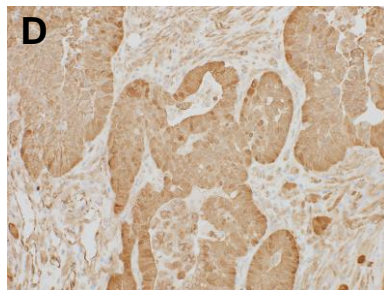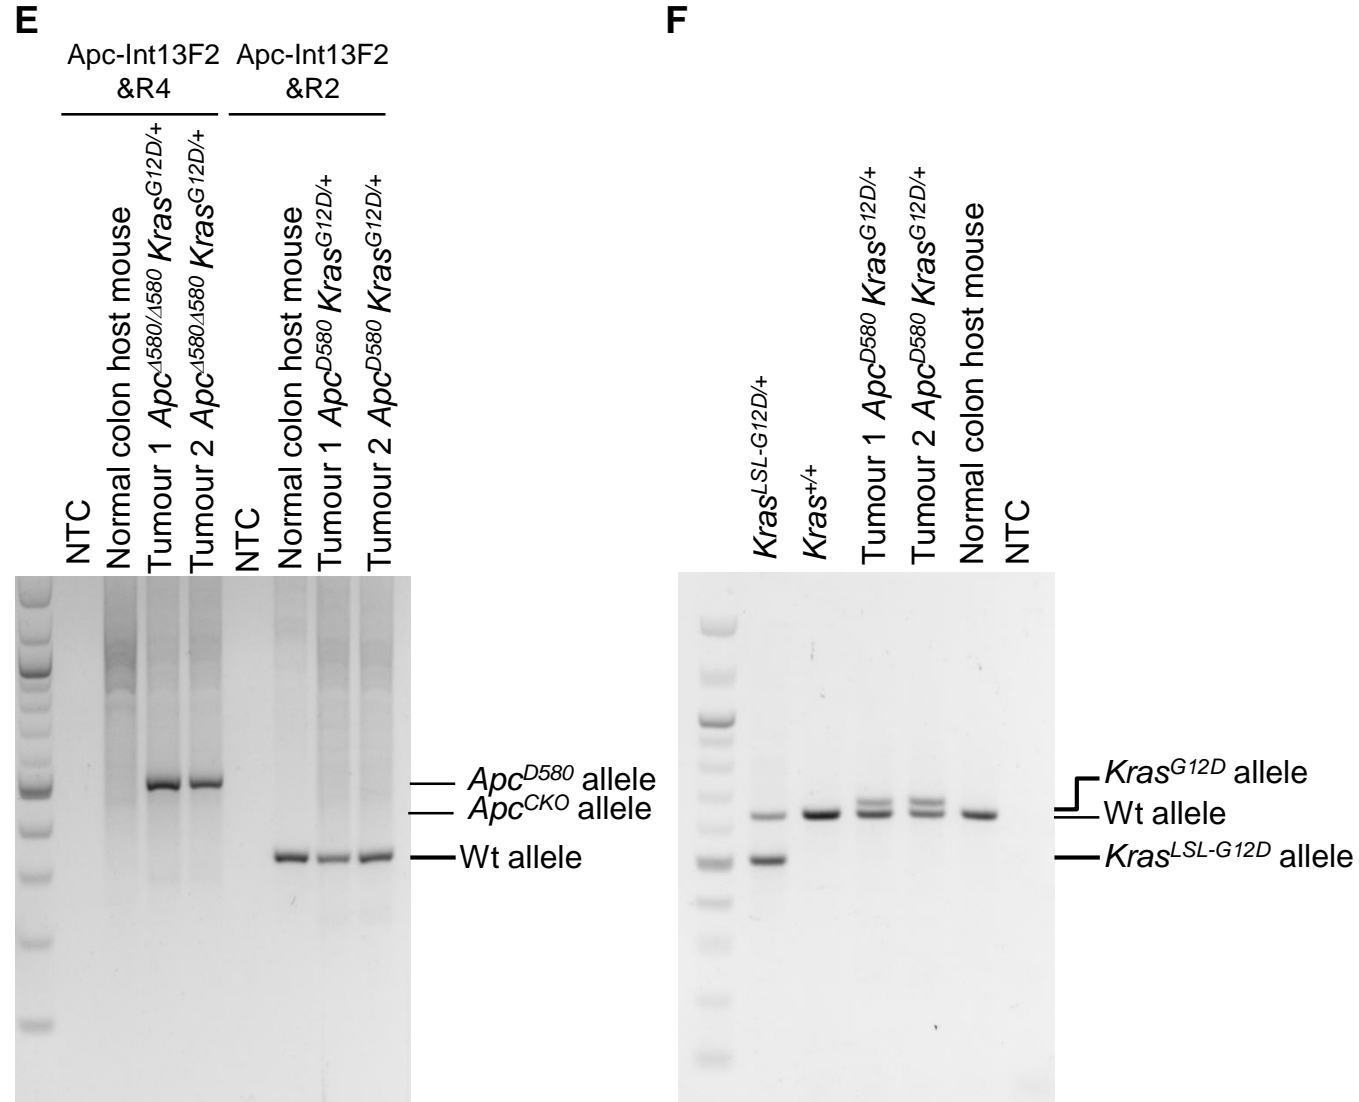



**Supplementary Table 1-Sanger sequencing the top bioinformatically predicted *Tgfr2* and *Bmpr2* gRNA off-target sites reveals no off-target events in mutant organoid lines.**

|                    | Location                               | Sequence                                 | Mismatches | Strand | Type       | Comments-sequencing each locus in gDNA isolated from CRISPR/Cas9 gene edited organoid |
|--------------------|----------------------------------------|------------------------------------------|------------|--------|------------|---------------------------------------------------------------------------------------|
| Tgfr2 gRNA On-site | <a href="#">9:116174992-116175014</a>  | GGACGATATGCAGCGGCCACAGG                  | 0          | +      | Exonic     |                                                                                       |
| Tgfr2_off_site1    | <a href="#">18:65431501-65431523</a>   | GGAA <b>G</b> ATATGA <b>A</b> GGCCAC TGG | 3          | -      | Intronic   | No change compared to reference mouse genome                                          |
| Tgfr2_off_site2    | <a href="#">13:74221583-74221605</a>   | <b>GGAC</b> CATATGCAG <b>TGGT</b> CACAGG | 3          | +      | Intronic   | No change compared to reference mouse genome                                          |
| Tgfr2_off_site3    | <a href="#">12:26345670-26345692</a>   | GG <b>CTC</b> ATGCAGCGGCCACAGG           | 4          | -      | Intronic   | No change compared to reference mouse genome                                          |
| Tgfr2_off_site4    | <a href="#">4:74305539-74305561</a>    | GGAG <b>CTT</b> ATGCAGAGGCCACAGG         | 4          | -      | Intronic   | Repeat sequence, Sanger sequencing not possible                                       |
| Tgfr2_off_site5    | <a href="#">4:124246525-124246547</a>  | GGAA <b>GGA</b> AGCAGAGGCCACAGG          | 4          | +      | Intergenic | No change compared to reference mouse genome                                          |
| Tgfr2_off_site6    | <a href="#">1:87663023-87663045</a>    | GGAC <b>GGA</b> AGCAGAGGCCAC TGG         | 4          | +      | Intronic   | No change compared to reference mouse genome                                          |
| Tgfr2_off_site7    | <a href="#">7:69437642-69437664</a>    | GGAC <b>CTG</b> TGAAGGCCAC TGG           | 4          | -      | Intergenic | No change compared to reference mouse genome                                          |
| Tgfr2_off_site8    | <a href="#">12:118438479-118438501</a> | GGAT <b>TAT</b> ATGCAGGCCAC TGG          | 4          | +      | Intergenic | No change compared to reference mouse genome                                          |
| Tgfr2_off_site9    | <a href="#">8:13155901-13155923</a>    | GGAA <b>TAT</b> ATGCAGGCCACAGG           | 4          | +      | Intergenic | No change compared to reference mouse genome                                          |
| Tgfr2_off_site10   | <a href="#">6:29249997-29250019</a>    | GGAA <b>GAT</b> ATGA <b>AA</b> GGCCACAGG | 4          | -      | Intergenic | No change compared to reference mouse genome                                          |

|                   | Location                              | Sequence                                            | Mismatches | Strand | Type       | Comments-sequencing each locus in gDNA isolated from CRISPR/Cas9 gene edited organoid                                                  |
|-------------------|---------------------------------------|-----------------------------------------------------|------------|--------|------------|----------------------------------------------------------------------------------------------------------------------------------------|
| Mlh1 gRNA On-site | <a href="#">9:111271459-111271481</a> | TAGTGAACCGCATAGCGCG GGG                             | 0          | -      | Exonic     |                                                                                                                                        |
| Mlh1_Off_Site1    | <a href="#">12:99158597-99158619</a>  | CAGTGAAC <b>AG</b> CATAGCGGG AGG                    | 3          | -      | Intergenic | No change compared to reference mouse genome                                                                                           |
| Mlh1_Off_Site2    | <a href="#">14:53741961-53741983</a>  | TAGTAA <b>AC</b> AGCAGCGCGGAGG                      | 4          | +      | Intergenic | Identical to reference mouse genome except for SNP:rs579384457. This SNP present in parental mouse gDNA, i.e. not an off-target event. |
| Mlh1_Off_Site3    | <a href="#">15:84631904-84631926</a>  | TAG <b>A</b> GAAC <b>AG</b> CATGGGGCG GGG           | 4          | -      | Intergenic | No change compared to reference mouse genome                                                                                           |
| Mlh1_Off_Site4    | <a href="#">15:36853646-36853668</a>  | TAGT <b>AT</b> CC <b>CA</b> TAGGGCCG GGG            | 4          | +      | Intergenic | No change compared to reference mouse genome                                                                                           |
| Mlh1_Off_Site5    | <a href="#">9:69989986-69990008</a>   | TAG <b>T</b> C <b>AC</b> CCATAG <b>CT</b> CG GGG    | 4          | +      | Intronic   | No change compared to reference mouse genome                                                                                           |
| Mlh1_Off_Site6    | <a href="#">10:61247708-61247730</a>  | TAG <b>A</b> GA <b>AC</b> G <b>CA</b> AGCGGG AGG    | 4          | +      | Intronic   | No change compared to reference mouse genome                                                                                           |
| Mlh1_Off_Site7    | <a href="#">5:137788331-137788353</a> | T <b>ACT</b> GA <b>ACC</b> CA <b>CA</b> AGCGGAG GGG | 4          | -      | Intronic   | No change compared to reference mouse genome                                                                                           |
| Mlh1_Off_Site8    | <a href="#">8:50161834-50161856</a>   | TAGTGA <b>ACA</b> CAGAGCGGG GGG                     | 4          | -      | Intergenic | Repeat sequence, Sanger sequencing not possible                                                                                        |
| Mlh1_Off_Site9    | <a href="#">1:143952103-143952125</a> | TAG <b>A</b> GA <b>ACC</b> ATAG <b>T</b> GGTGTGG    | 4          | -      | Intergenic | No change compared to reference mouse genome                                                                                           |

**Supplementary Table 2.** Loss of function insertions/deletions (indels) at target sites using CRISPR/Cas9 combined with media selection for correctly targeted organoid clones. Sanger sequencing of each target site allele and resulting change to protein sequence is displayed in the table below. N.B.\* we sequenced 7 plasmid clones containing PCR-amplified *p16lnk4a* target genomic sequence and all were identical. This suggests that likely both alleles were altered in an identical manner or a larger deletion has removed the PCR primer sites at the target site for allele 2.

|                        | wt protein | DNA Δ    | Change to Protein                | DNA Δ            | Change to Protein                    |
|------------------------|------------|----------|----------------------------------|------------------|--------------------------------------|
|                        |            | Allele 1 |                                  | Allele 2         |                                      |
| <b><i>Rnf43</i></b>    | 784 aa     | 5bp del  | p.R246fs* (premature stop 250aa) | 10bp del         | p.R246fs* (premature stop 272aa)     |
| <b><i>Znrf3</i></b>    | 913 aa     | 3bp del  | p.T308del (912aa)                | 4bp ins          | p.T308ins* (premature stop 337aa)    |
| <b><i>Tgfβr2</i></b>   | 567 aa     | 13bp del | p.L9fs* (premature stop 51aa)    | 339bp del        | Removes +1ATG translation start site |
| <b><i>p16lnk4a</i></b> | 168 aa     | 1 bp del | p. S34fs* (premature stop 42aa)  | *                |                                      |
| <b><i>Mlh1</i></b>     | 760 aa     | 31bp del | p.L10fs* (premature stop 24aa)   | 2bp ins+12bp del | p.A19fs* (premature stop 31aa)       |

|                                           | Tumour ID               | Type                             | Serrated Features      |                    |              |                  |                     |                    |                     |       | Desmoplastic stromal reaction | Infiltrative growth | Tumour budding |                               |                     |
|-------------------------------------------|-------------------------|----------------------------------|------------------------|--------------------|--------------|------------------|---------------------|--------------------|---------------------|-------|-------------------------------|---------------------|----------------|-------------------------------|---------------------|
|                                           |                         |                                  | eosinophilic cytoplasm | abundant cytoplasm | basal nuclei | vesicular nuclei | prominent nucleolus | luminal serrations | absence of necrosis | mucin |                               |                     |                | cell balls and papillary rods | Total score         |
| <i>Braf</i> <sup>V600E</sup> ΔT (n=6)     | 402                     | Adenocarcinoma                   | 1                      | 0                  | 0            | 1                | 1                   | 0                  | 1                   | 0     | 0                             | 4                   | Minimal        | Present                       | Absent              |
|                                           | 197                     | Adenocarcinoma                   | 0                      | 0                  | 1            | 1                | 0                   | 0                  | 1                   | 0     | 0                             | 3                   | Present        | Present                       | Absent              |
|                                           | 199                     | Adenocarcinoma                   | 0                      | 0                  | 1            | 0                | 0                   | 1                  | 1                   | 0     | 0                             | 3                   | Minimal        | Present                       | Absent              |
|                                           | 457                     | Adenocarcinoma                   | 0                      | 0                  | 1            | 1                | 1                   | 0                  | 1                   | 0     | 0                             | 4                   | Minimal        | Present                       | Absent              |
|                                           | 401                     | Adenocarcinoma                   | 1                      | 0                  | 1            | 1                | 1                   | 0                  | 1                   | 1     | 1                             | 7                   | Present        | Present                       | Absent              |
|                                           | 403                     | Adenocarcinoma                   | 0                      | 0                  | 0            | 0                | 0                   | 0                  | 1                   | 0     | 0                             | 1                   | Absent         | Present                       | Absent              |
| <i>Braf</i> <sup>V600E</sup> ΔTRZI (n=14) | 348                     | High grade tubulovillous adenoma | 0                      | 0                  | 0            | 0                | 0                   | 0                  | 1                   | 0     | 0                             | 1                   | Absent         | Absent                        | Absent              |
|                                           | 349                     | Adenocarcinoma                   | 0                      | 0                  | 0            | 1                | 1                   | 0                  | 1                   | 1     | 0                             | 4                   | Present        | Absent                        | Absent              |
|                                           | 351                     | Mucinous adenocarcinoma          | 0                      | 0                  | 0            | 0                | 0                   | 0                  | 1                   | 1     | 1                             | 3                   | Present        | Present                       | Present (low level) |
|                                           | 352                     | Adenocarcinoma                   | 0                      | 0                  | 0            | 1                | 1                   | 0                  | 1                   | 0     | 0                             | 3                   | Absent         | Present                       | Absent              |
|                                           | 353                     | Mucinous adenocarcinoma          | 0                      | 0                  | 0            | 0                | 0                   | 0                  | 1                   | 1     | 1                             | 3                   | Present        | Present                       | Present (low level) |
|                                           | 354                     | Mucinous adenocarcinoma          | 0                      | 0                  | 0            | 0                | 0                   | 0                  | 1                   | 1     | 1                             | 3                   | Present        | Present                       | Absent              |
|                                           | 112                     | Mucinous adenocarcinoma          | 0                      | 0                  | 1            | 0                | 0                   | 0                  | 1                   | 1     | 0                             | 3                   | Present        | Present                       | Present (low level) |
|                                           | 111                     | Adenocarcinoma                   | 0                      | 0                  | 1            | 1                | 0                   | 0                  | 1                   | 1     | 0                             | 4                   | Present        | Present                       | Absent              |
|                                           | 109                     | Adenocarcinoma                   | 0                      | 0                  | 1            | 0                | 0                   | 0                  | 1                   | 1     | 1                             | 4                   | Present        | Present                       | Absent              |
|                                           | 108                     | Adenocarcinoma                   | 0                      | 0                  | 1            | 0                | 0                   | 0                  | 1                   | 1     | 0                             | 3                   | Present        | Present                       | Absent              |
|                                           | 107                     | Adenocarcinoma                   | 0                      | 0                  | 1            | 1                | 0                   | 0                  | 1                   | 1     | 0                             | 4                   | Present        | Present                       | Present (low level) |
|                                           | 106                     | Adenocarcinoma                   | 0                      | 0                  | 1            | 0                | 0                   | 0                  | 1                   | 1     | 0                             | 3                   | Present        | Present                       | Present (low level) |
| 105                                       | Mucinous adenocarcinoma | 0                                | 0                      | 0                  | 0            | 0                | 0                   | 1                  | 1                   | 1     | 3                             | Present             | Present        | Present (low level)           |                     |
| <i>Braf</i> <sup>V600E</sup> ΔTRZIM (n=6) | 516                     | Adenocarcinoma                   | 0                      | 0                  | 0            | 0                | 0                   | 0                  | 1                   | 0     | 0                             | 1                   | Absent         | Absent                        | Absent              |
|                                           | 517                     | Mucinous adenocarcinoma          | 0                      | 0                  | 0            | 0                | 0                   | 0                  | 1                   | 1     | 1                             | 3                   | Present        | Present                       | Absent              |
|                                           | 518                     | Adenocarcinoma                   | 0                      | 0                  | 0            | 0                | 0                   | 0                  | 0                   | 0     | 0                             | 0                   | Absent         | Present                       | Absent              |
|                                           | 519                     | Mucinous adenocarcinoma          | 0                      | 0                  | 0            | 0                | 0                   | 0                  | 1                   | 1     | 1                             | 3                   | Present        | Present                       | Absent              |
|                                           | 566                     | Mucinous adenocarcinoma          | 0                      | 0                  | 0            | 0                | 0                   | 0                  | 1                   | 1     | 1                             | 3                   | Present        | Present                       | Present (low level) |
|                                           | 567                     | Adenocarcinoma                   | 0                      | 0                  | 0            | 1                | 1                   | 0                  | 1                   | 0     | 0                             | 3                   | Minimal        | Absent                        | Absent              |

**Supplementary Table 3.** Pathology scoring of mouse tumours for type (WHO classification 4<sup>th</sup> Ed, 2010), serrated features common to human serrated adenocarcinoma (WHO classification 4<sup>th</sup> Ed, 2010), the desmoplastic stromal reaction, infiltrative growth and tumour budding properties.

|                                                                                                | ES    | NES   | NOM.p val | FDR q-val |
|------------------------------------------------------------------------------------------------|-------|-------|-----------|-----------|
| <b>Top 5 GSEAs <i>Braf</i><sup>V600E</sup> <math>\Delta</math>T tumour vs normal colon</b>     |       |       |           |           |
| REACTOME_SPHINGOLIPID_DE_NOVO_BIOSYNTHESIS                                                     | 0.539 | 2.629 | 0.00      | 0.013     |
| REACTOME_SPHINGOLIPID_METABOLISM                                                               | 0.494 | 2.276 | 0.00      | 0.013     |
| KEGG_LYSOSOME                                                                                  | 0.452 | 2.147 | 0.00      | 0.018     |
| KEGG_TOLL_LIKE_RECEPTOR_SIGNALING_PATHWAY                                                      | 0.581 | 1.989 | 0.00      | 0.015     |
| KEGG_CHEMOKINE_SIGNALING_PATHWAY                                                               | 0.638 | 1.948 | 0.00      | 0.016     |
| <b>Top 5 GSEAs <i>Braf</i><sup>V600E</sup> <math>\Delta</math>TRZI tumour vs normal colon</b>  |       |       |           |           |
| REACTOME_SPHINGOLIPID_DE_NOVO_BIOSYNTHESIS                                                     | 0.45  | 2.267 | 0.00      | 0.028     |
| KEGG_LEISHMANIA_INFECTION                                                                      | 0.743 | 2.145 | 0.00      | 0.023     |
| KEGG_TOLL_LIKE_RECEPTOR_SIGNALING_PATHWAY                                                      | 0.556 | 2.061 | 0.00      | 0.022     |
| ST_ERK1_ERK2_MAPK_PATHWAY                                                                      | 0.578 | 2.045 | 0.00      | 0.023     |
| REACTOME_DEADENYLATION_OF_MRNA                                                                 | 0.523 | 1.97  | 0.00      | 0.031     |
| <b>Top 5 GSEAs <i>Braf</i><sup>V600E</sup> <math>\Delta</math>TRZIM tumour vs normal colon</b> |       |       |           |           |
| REACTOME_SPHINGOLIPID_DE_NOVO_BIOSYNTHESIS                                                     | 0.502 | 2.526 | 0.00      | 0.013     |
| KEGG_APOPTOSIS                                                                                 | 0.389 | 2.027 | 0.00      | 0.038     |
| ST_P38_MAPK_PATHWAY                                                                            | 0.39  | 1.93  | 0.00      | 0.030     |
| KEGG_LEISHMANIA_INFECTION                                                                      | 0.672 | 1.889 | 0.00      | 0.027     |
| KEGG_RIG_I_LIKE_RECEPTOR_SIGNALING_PATHWAY                                                     | 0.348 | 1.88  | 0.00      | 0.030     |
| <b>Top 5 GSEAs in <i>Kras</i><sup>G12D</sup><i>Apc</i><sup>A/A</sup> tumour vs normal</b>      |       |       |           |           |
| REACTOME_EGFR_DOWNREGULATION                                                                   | 0.439 | 2.058 | 0.00      | 0.055     |
| REACTOME_ANTIVIRAL_MECHANISM_BY_IFN_STIMULATED_GENES                                           | 0.33  | 1.662 | 0.00      | 1.000     |
| KEGG_CITRATE_CYCLE_TCA_CYCLE                                                                   | 0.607 | 1.621 | 0.00      | 0.723     |
| KEGG_PYRUVATE_METABOLISM                                                                       | 0.597 | 1.619 | 0.00      | 0.683     |
| REACTOME_GLUCCONEOGENESIS                                                                      | 0.595 | 1.604 | 0.00      | 0.644     |

**Supplementary Table 4.** Top 5 gene sets enriched for each pair-wise comparison of normal mouse colon with tumour samples. Nominal p values (NOM.p val) all <0.001. Enrichment score (ES), false discovery rate (FDR), normalized enrichment score (NES).

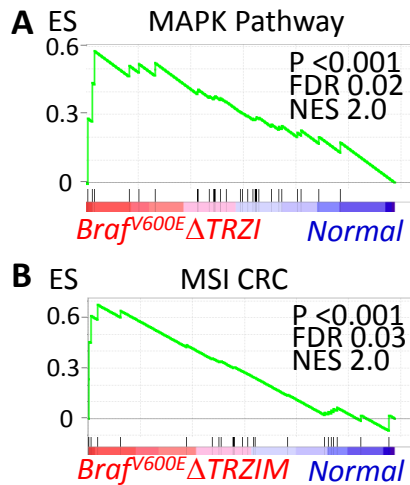

**Supplementary Figure 10.** GSEA identified differential expression of **(A)** ERK1/2 MAPK pathway transcripts in the *Braf<sup>V600E</sup>ΔTRZI* tumours and **(B)** transcripts up-regulated in a human MSI-CRC gene set (Watanabe *et al.*, Cancer Res 2006;66:9804-8) in the *Braf<sup>V600E</sup>ΔTRZIM* tumours compared to normal colon. Enrichment score (ES), false discovery rate (FDR), normalized enrichment score (NES).

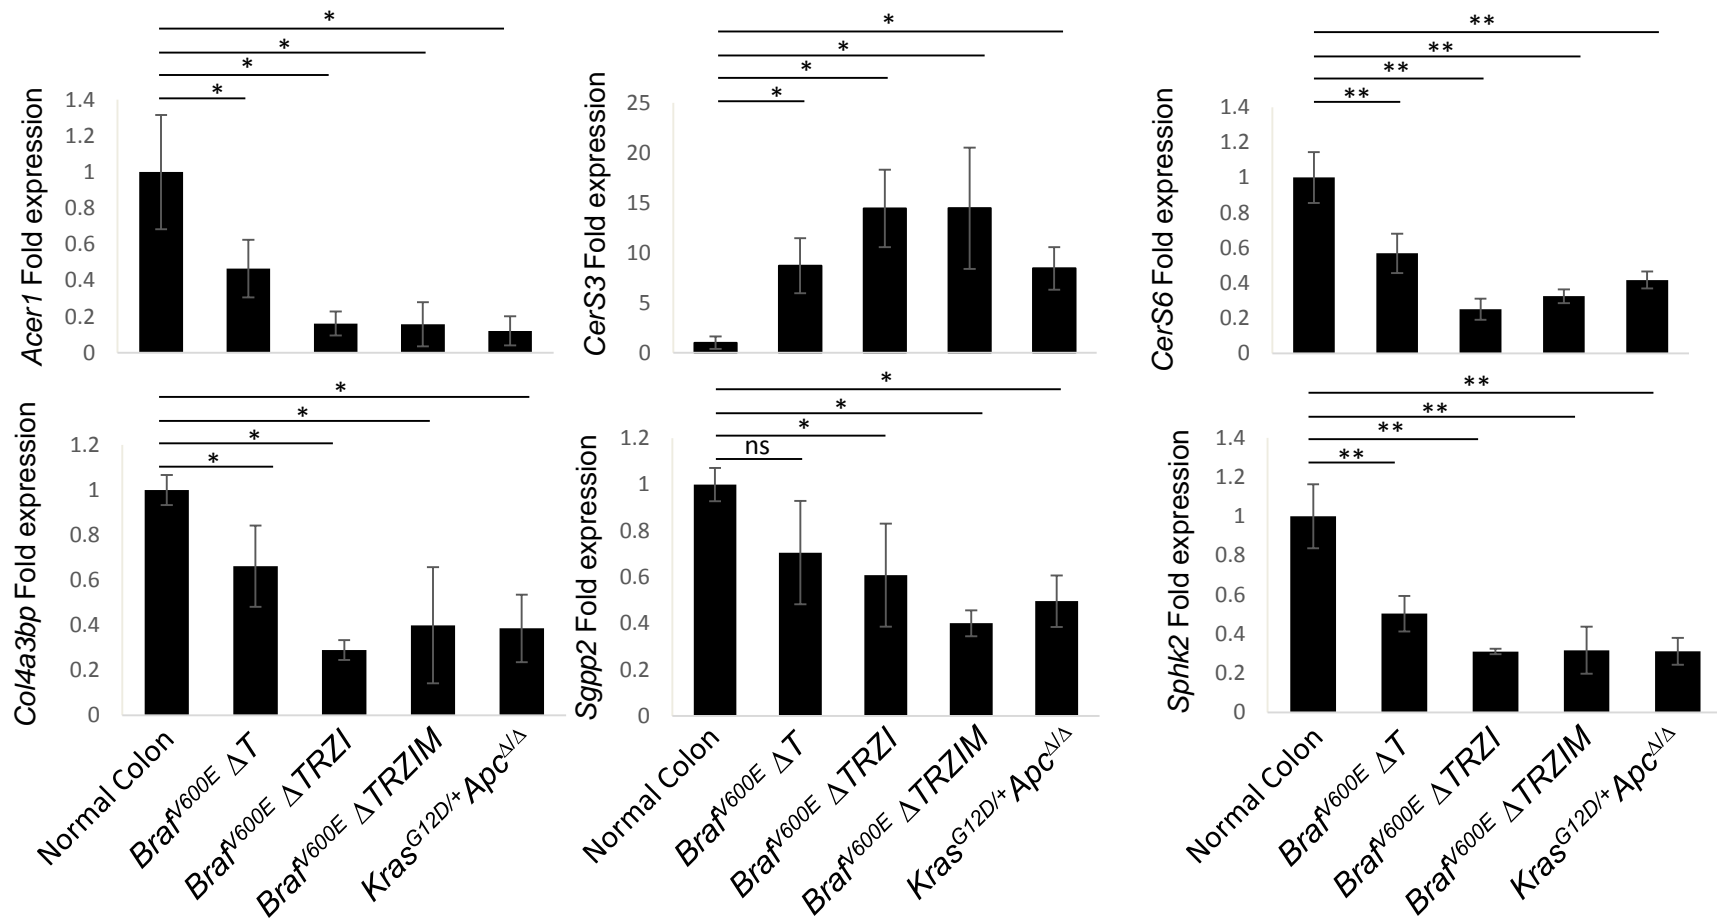

**Supplementary Figure 11.** Differential expression of spingolipid metabolism transcripts in normal mouse colon and tumours generated from *BraF<sup>V600E</sup>* organoid series and *Kras<sup>G12D/+</sup>Apc<sup>Δ/Δ</sup>* organoids. qPCR validation of RNAseq leading edge genes from GSEA. Expression of *CerS3* is increased and *Acer1*, *CerS6*, *Col4a3bp*, *Sgpp2*, *Sphk2* are decreased in tumours compared to normal colon. Fold induction of mRNA expression is normalized to *Gapdh*, with transcript level in normal colon set to 1. Results from at least four animals with triplicate technical replicates are shown, error bars denote standard deviation. Two-tailed t-test was used for pair-wise statistical analysis. ns=not significant, \*=p<0.05, \*\*=p<0.01.
