# Supplementary material
Source: PubMed Central journal article supplement (PMC6192855)
Supplement: NIHMS965093-supplement-Supp6.pdf [file NIHMS965093-supplement-Supp6.pdf]

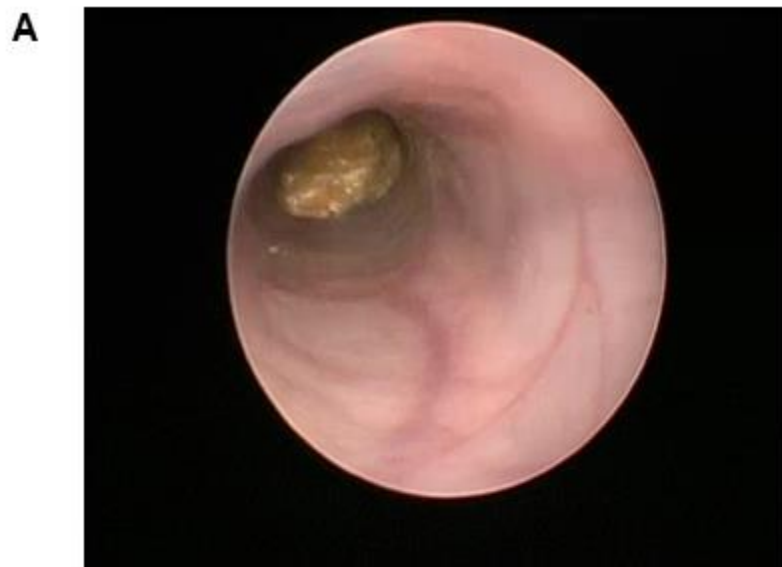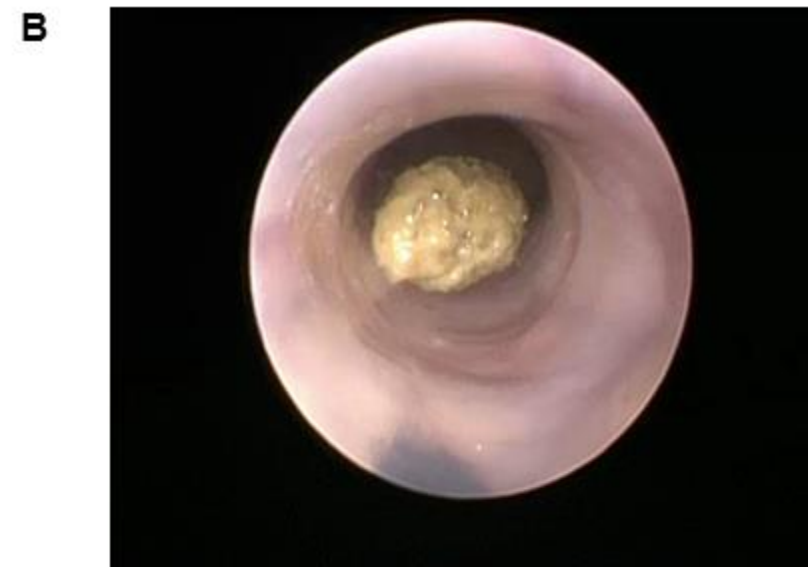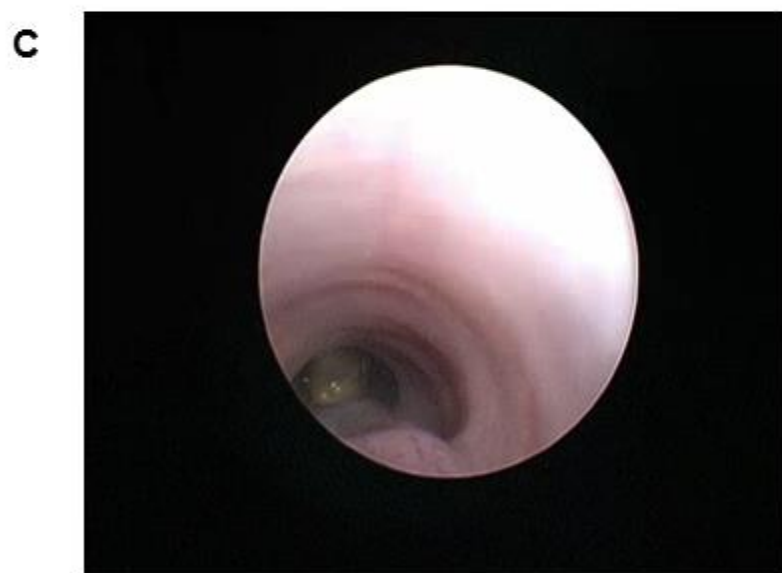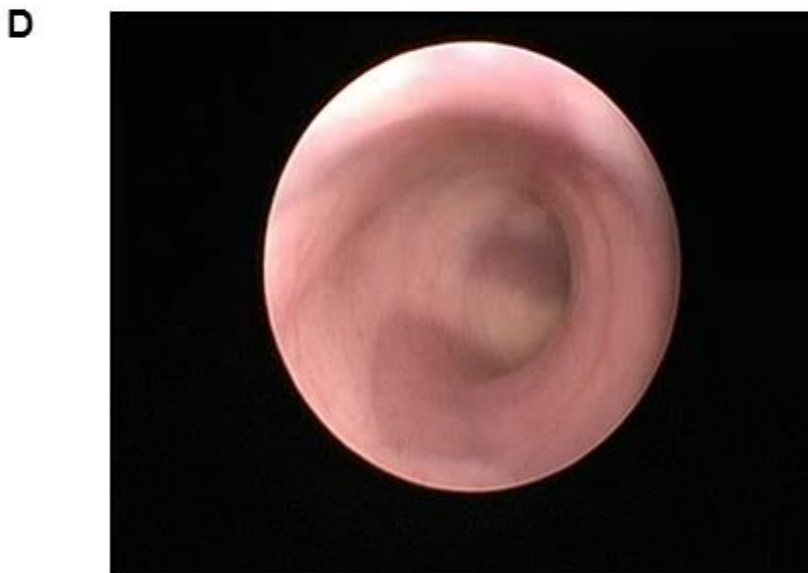

**Supp Videos. Multi-hit 'serratooids' generate invasive adenocarcinoma with serrated features.** Colonoscopy videos of NSG mouse colon orthotopically injected with mutant organoid lines **(A)** *Braf*<sup>V600E</sup> 8 weeks post-injection, **(B)** *Braf*<sup>V600E</sup>  $\Delta$ *Tgfbr2* 4 weeks post-injection, **(C)** *Braf*<sup>V600E</sup>  $\Delta$ *Tgfbr2*  $\Delta$ *Rnf43/Znrf3*  $\Delta$ *p16Ink4a* 3 weeks post-injection, **(D)** *Braf*<sup>V600E</sup>  $\Delta$ *Tgfbr2*  $\Delta$ *Rnf43/Znrf3*  $\Delta$ *p16Ink4a*  $\Delta$ *Mlh1* 3 weeks post-injection.
